# Supplementary material
Source: PubMed Central journal article supplement (PMC5686614)
Supplement: JB.00476-17_zjb999094589s1.pdf [file JB.00476-17_zjb999094589s1.pdf]

**Supplemental Table 1.**  
**List of nucleotide polymorphisms identify in the genomes of the four strains used in the study**

| mutant nature | product name                             | locus tag            | nucleotide change | protein change | genomic position | ref | alt | Newman DZC | NYU Newman | NCBI LT50668.1 | NCBI NC_009641.1 |
|---------------|------------------------------------------|----------------------|-------------------|----------------|------------------|-----|-----|------------|------------|----------------|------------------|
| intergenic    | promoter                                 | NWNA_0002            | NA                | NA             | 2075             | C   | A   | 1          |            |                |                  |
| hSNP          | pyrimidine 5-carboxylate reductase       | NWNA_1410            | A880T             | K227I          | 157872           | A   | T   | 1          | 1          |                |                  |
| hSNP          | hsp70                                    | NWNA_0005            | A104G             | S445S          | 87717            | A   | G   | 1          |            | 1              |                  |
| intergenic    | promoter                                 | NWNA_0473            | NA                | NA             | 54525            | G   | A   | 1          |            |                |                  |
| intergenic    | promoter                                 | NWNA_0668, NWNA_0667 | NA                | NA             | 747009           | G   | A   | 1          |            |                |                  |
| intergenic    | promoter                                 | NWNA_0724            | NA                | NA             | 812220           | C   | A   | 1          |            |                |                  |
| intergenic    | promoter                                 | NWNA_1036            | NA                | NA             | 2044045          | T   | A   | 1          |            |                |                  |
| intergenic    | promoter                                 | NWNA_1036            | NA                | NA             | 2044045          | G   | C   | 1          |            |                |                  |
| hSNP          | hypothetical protein                     | NWNA_0545            | T602G             | L201R          | 304464           | A   | C   | 1          |            |                |                  |
| hSNP          | uacR                                     | NWNA_0675            | C365T             | R199C          | 757767           | G   | A   | 1          |            |                |                  |
| hSNP          | hypothetical protein                     | NWNA_0842            | C701A             | A254D          | 930724           | G   | T   | 1          |            |                |                  |
| hSNP          | hsp70                                    | NWNA_0079            | T193A             | N622Y          | 1007285          | T   | A   | 1          |            |                |                  |
| hSNP          | hsp70                                    | NWNA_1307            | T419G             | V140G          | 1445345          | T   | G   | 1          |            |                |                  |
| hSNP          | hypothetical protein                     | NWNA_1372            | T100C             | S54P           | 1538868          | A   | G   | 1          |            |                |                  |
| hSNP          | hsp70                                    | NWNA_1040            | A275G             | E702G          | 2044045          | A   | G   | 1          |            |                |                  |
| hSNP          | hypothetical protein                     | NWNA_1036            | G452A             | M134I          | 2166132          | C   | T   | 1          |            |                |                  |
| hSNP          | glucosamine-6-phosphatase                | NWNA_0532            | T279C             | P93P           | 618892           | T   | C   | 1          |            |                |                  |
| hSNP          | hypothetical protein                     | NWNA_2252            | T279C             | I93I           | 2474681          | T   | C   | 1          |            |                |                  |
| hsp70         | hsp70                                    | NWNA_1046            | C106A             | T98K           | 215370           | C   | A   | 1          |            |                |                  |
| hSNP          | hsp70                                    | NWNA_0009            | G208A             | A79E           | 56230            | G   | A   | 1          |            | 1              |                  |
| hSNP          | hsp70                                    | NWNA_1034            | C239G             | S79C           | 1188921          | C   | G   | 1          |            | 1              |                  |
| intergenic    | downstream                               | NWNA_0002            | NA                | NA             | 2075             | T   | C   |            |            |                | 1                |
| intergenic    | downstream                               | NWNA_0002            | NA                | NA             | 2077             | C   | A   |            |            |                | 1                |
| intergenic    | promoter                                 | NWNA_0343, NWNA_0344 | NA                | NA             | 362294           | T   | A   |            |            |                | 1                |
| intergenic    | promoter                                 | NWNA_0343, NWNA_0344 | NA                | NA             | 362277           | A   | C   |            |            |                | 1                |
| hSNP          | hsp70                                    | NWNA_0407            | A113T             | N28I           | 456831           | A   | T   |            |            |                | 1                |
| hSNP          | hsp70                                    | NWNA_0407            | T114C             | N39N           | 456832           | T   | C   |            |            |                | 1                |
| hSNP          | hsp70                                    | NWNA_0201            | G173A             | G26E           | 1373465          | C   | T   |            |            |                | 1                |
| hSNP          | hsp70                                    | NWNA_0201            | A170G             | E57V           | 1373466          | T   | C   |            |            |                | 1                |
| hSNP          | hsp70                                    | NWNA_0201            | C130A             | R465S          | 1373711          | C   | A   |            |            |                | 1                |
| hSNP          | hsp70                                    | NWNA_0204            | G136C             | H45P           | 1377872          | G   | C   |            |            |                | 1                |
| hSNP          | hsp70                                    | NWNA_0204            | T105G             | R465H          | 1377873          | T   | G   |            |            |                | 1                |
| hSNP          | hsp70                                    | NWNA_1308            | C837P             | P213P          | 1441314          | C   | T   |            |            |                | 1                |
| hSNP          | hsp70                                    | NWNA_1308            | T840G             | G214G          | 1441315          | T   | G   |            |            |                | 1                |
| hSNP          | hsp70                                    | NWNA_1308            | G841C             | G214S          | 1441316          | G   | C   |            |            |                | 1                |
| hSNP          | hsp70                                    | NWNA_1308            | A854G             | K219K          | 1441320          | A   | G   |            |            |                | 1                |
| hSNP          | hsp70                                    | NWNA_1308            | G855C             | A219P          | 1441330          | G   | C   |            |            |                | 1                |
| hSNP          | pyrimidine 5-carboxylate reductase       | NWNA_1410            | A846C             | T210P          | 1578838          | A   | C   |            |            |                | 1                |
| hSNP          | pyrimidine 5-carboxylate reductase       | NWNA_1410            | C847G             | T210R          | 1578839          | C   | G   |            |            |                | 1                |
| hSNP          | pyrimidine 5-carboxylate reductase       | NWNA_1410            | A874G             | K229R          | 1578906          | A   | G   |            |            |                | 1                |
| intergenic    | promoter                                 | NWNA_2314            | NA                | NA             | 2542031          | T   | A   |            |            |                | 1                |
| intergenic    | promoter                                 | NWNA_2314            | NA                | NA             | 2542034          | T   | A   |            |            |                | 1                |
| intergenic    | promoter                                 | NWNA_2314            | NA                | NA             | 2542035          | C   | T   |            |            |                | 1                |
| intergenic    | promoter                                 | NWNA_0470            | NA                | NA             | 267707           | T   | C   |            |            |                | 1                |
| intergenic    | promoter                                 | NWNA_0343, NWNA_0344 | NA                | NA             | 362279           | T   | A   |            |            |                | 1                |
| hSNP          | hypothetical protein                     | NWNA_0375            | T657A             | N219K          | 423566           | A   | T   |            |            |                | 1                |
| hSNP          | hypothetical protein                     | NWNA_0421            | A189G             | L83L           | 472775           | A   | G   |            |            |                | 1                |
| hSNP          | hypothetical protein                     | NWNA_0421            | T368A             | V170V          | 472786           | T   | A   |            |            |                | 1                |
| hSNP          | hypothetical protein                     | NWNA_0421            | A414G             | R139P          | 472826           | A   | G   |            |            |                | 1                |
| hSNP          | hypothetical protein                     | NWNA_0421            | T453C             | A151A          | 473039           | T   | C   |            |            |                | 1                |
| hSNP          | hypothetical protein                     | NWNA_0421            | A485T             | I150I          | 473051           | A   | T   |            |            |                | 1                |
| hSNP          | hypothetical protein                     | NWNA_0421            | C311T             | L171L          | 473207           | C   | T   |            |            |                | 1                |
| hSNP          | hypothetical protein                     | NWNA_0421            | A175G             | L171L          | 473208           | A   | G   |            |            |                | 1                |
| hSNP          | hypothetical protein                     | NWNA_0421            | G557A             | A168A          | 473153           | G   | A   |            |            |                | 1                |
| intergenic    | promoter                                 | NWNA_0426            | NA                | NA             | 476336           | A   | G   |            |            |                | 1                |
| intergenic    | promoter                                 | NWNA_0426            | NA                | NA             | 476400           | T   | A   |            |            |                | 1                |
| intergenic    | promoter                                 | NWNA_0426            | NA                | NA             | 476401           | T   | C   |            |            |                | 1                |
| hSNP          | hsp70                                    | NWNA_0406, NWNA_0407 | NA                | NA             | 479405           | C   | T   |            |            |                | 1                |
| hSNP          | hsp70                                    | NWNA_0406            | T183G             | I614I          | 519235           | T   | G   |            |            |                | 1                |
| hSNP          | hsp70                                    | NWNA_0509            | C194T             | L552P          | 586902           | C   | T   |            |            |                | 1                |
| hSNP          | hsp70                                    | NWNA_0509            | C198A             | H851N          | 586929           | C   | A   |            |            |                | 1                |
| hSNP          | hsp70                                    | NWNA_0509            | A202G             | R674V          | 586930           | A   | G   |            |            |                | 1                |
| intergenic    | promoter                                 | NWNA_0510            | NA                | NA             | 587079           | C   | T   |            |            |                | 1                |
| intergenic    | promoter                                 | NWNA_0510            | NA                | NA             | 587114           | C   | T   |            |            |                | 1                |
| intergenic    | promoter                                 | NWNA_0510, NWNA_0511 | NA                | NA             | 588072           | T   | G   |            |            |                | 1                |
| hSNP          | chaperone protein Hsp70                  | NWNA_0513            | A861C             | S215I          | 602110           | A   | C   |            |            |                | 1                |
| hSNP          | uvrB                                     | NWNA_0726            | G235A             | A109T          | 614719           | G   | A   |            |            |                | 1                |
| hSNP          | uvrB                                     | NWNA_0726            | G337T             | M111I          | 614767           | G   | T   |            |            |                | 1                |
| hSNP          | uvrB                                     | NWNA_0726            | G370C             | V134L          | 614804           | G   | C   |            |            |                | 1                |
| intergenic    | promoter                                 | NWNA_0811            | NA                | NA             | 807347           | A   | G   |            |            |                | 1                |
| intergenic    | promoter                                 | NWNA_0811            | NA                | NA             | 807350           | A   | T   |            |            |                | 1                |
| intergenic    | promoter                                 | NWNA_0811            | NA                | NA             | 807313           | G   | A   |            |            |                | 1                |
| intergenic    | promoter                                 | NWNA_0811            | NA                | NA             | 807314           | A   | G   |            |            |                | 1                |
| hSNP          | RNA dependent RNA polymerase             | NWNA_0819            | A268G             | T8E            | 807710           | A   | G   |            |            |                | 1                |
| hSNP          | hypothetical protein                     | NWNA_0856            | A217T             | I75L           | 966700           | A   | T   |            |            |                | 1                |
| hSNP          | hypothetical protein                     | NWNA_0856            | T218A             | I73K           | 966710           | T   | A   |            |            |                | 1                |
| intergenic    | promoter                                 | NWNA_0913, NWNA_0920 | NA                | NA             | 997709           | G   | T   |            |            |                | 1                |
| hSNP          | glyoxylate shunt, Group 3 family protein | NWNA_0913            | G1342C            | K444N          | 1005209          | G   | C   |            |            |                | 1                |
| intergenic    | promoter                                 | NWNA_0971, NWNA_0973 | NA                | NA             | 1078197          | A   | G   |            |            |                | 1                |
| hSNP          | hypothetical protein                     | NWNA_1101            | T295A             | S99T           | 1205713          | T   | A   |            |            |                | 1                |
| hSNP          | hypothetical protein                     | NWNA_1101            | C304G             | G102E          | 1205722          | C   | G   |            |            |                | 1                |
| hSNP          | hypothetical protein                     | NWNA_1101            | T395G             | V190D          | 1206013          | T   | G   |            |            |                | 1                |
| hsp70         | hypothetical protein                     | NWNA_1101            | T397A             | V190V          | 1206015          | T   | A   |            |            |                | 1                |
| hSNP          | hypothetical protein                     | NWNA_1101            | T398A             | L300M          | 1206016          | T   | A   |            |            |                | 1                |
| hSNP          | hypothetical protein                     | NWNA_1101            | G628C             | G210R          | 1206046          | G   | C   |            |            |                | 1                |
| hSNP          | hypothetical protein                     | NWNA_1101            | G629A             | G210E          | 1206047          | G   | A   |            |            |                | 1                |
| hSNP          | hypothetical protein                     | NWNA_1101            | G630A             | G210G          | 1206048          | G   | A   |            |            |                | 1                |
| hSNP          | hypothetical protein                     | NWNA_1101            | G631C             | G211R          | 1206049          | G   | C   |            |            |                | 1                |
| hSNP          | hypothetical protein                     | NWNA_1101            | G632T             | G211V          | 1206050          | G   | T   |            |            |                | 1                |
| hSNP          | hypothetical protein                     | NWNA_1101            | G633A             | G211S          | 1206051          | G   | A   |            |            |                | 1                |
| hSNP          | hypothetical protein                     | NWNA_1101            | G634A             | G212S          | 1206052          | G   | A   |            |            |                | 1                |
| hSNP          | hypothetical protein                     | NWNA_1101            | G635T             | G212V          | 1206053          | G   | T   |            |            |                | 1                |
| hSNP          | hsp70                                    | NWNA_1167            | C265A             | A87E           | 1281985          | C   | A   |            |            |                | 1                |
| hSNP          | hsp70                                    | NWNA_1194            | C780T             | D360D          | 1316068          | C   | T   |            |            |                | 1                |
| hSNP          | hypothetical protein                     | NWNA_1214            | G148T             | N90E           | 1330797          | G   | T   |            |            |                | 1                |
| hSNP          | hypothetical protein                     | NWNA_1214            | T193G             | V91G           | 1330798          | T   | G   |            |            |                | 1                |
| hSNP          | hsp70                                    | NWNA_1201            | G138T             | G45G           | 1375503          | C   | A   |            |            |                | 1                |
| hSNP          | hsp70                                    | NWNA_1201            | C132A             | F41L           | 1375515          | G   | T   |            |            |                | 1                |
| hSNP          | hsp70                                    | NWNA_1201            | T122C             | F41L           | 1375516          | A   | G   |            |            |                | 1                |
| hSNP          | hsp70                                    | NWNA_1204            | A131T             | N439Y          | 1375763          | A   | T   |            |            |                | 1                |
| hSNP          | hypothetical protein                     | NWNA_1206            | C118T             | G45G           | 1376330          | C   | T   |            |            |                | 1                |
| hSNP          | hypothetical protein                     | NWNA_1206            | T168A             | I66I           | 1376393          | T   | A   |            |            |                | 1                |
| hSNP          | hypothetical protein                     | NWNA_1206            | G216A             | N67E           | 1376394          | G   | A   |            |            |                | 1                |
| hSNP          | hypothetical protein                     | NWNA_1206            | A211T             | D74V           | 1376416          | A   | T   |            |            |                | 1                |
| hSNP          | hypothetical protein                     | NWNA_1206            | G271A             | E91K           | 1376466          | G   | A   |            |            |                | 1                |
| hSNP          | hypothetical protein                     | NWNA_1206            | T281A             | I94K           | 1376476          | T   | A   |            |            |                | 1                |
| hSNP          | hypothetical protein                     | NWNA_1206            | C285A             | A96A           | 1376480          | C   | A   |            |            |                | 1                |
| hSNP          | pyrimidine 5-carboxylate reductase       | NWNA_1410            | C811G             | P204R          | 1578903          | C   | G   |            |            |                | 1                |
| hSNP          | pyrimidine 5-carboxylate reductase       | NWNA_1410            | A884T             | E218D          | 1578846          | A   | T   |            |            |                | 1                |
| hSNP          | pyrimidine 5-carboxylate reductase       | NWNA_1410            | A882T             | G28L           | 1578874          | A   | T   |            |            |                | 1                |
| hSNP          | pyrimidine 5-carboxylate reductase       | NWNA_1410            | G885T             | G212V          | 1578887          | G   | T   |            |            |                | 1                |
| hSNP          | pyrimidine 5-carboxylate reductase       | NWNA_1410            | A701G             | G204R          | 1578903          | A   | G   |            |            |                | 1                |
| hSNP          | pyrimidine 5-carboxylate reductase       | NWNA_1410            | A702C             | N209I          | 1578895          | A   | C   |            |            |                | 1                |
| hSNP          | GTP binding protein LepA                 | NWNA_1407            | G116T             | C386G          | 1655296          | C   | A   |            |            |                | 1                |
| hSNP          | hsp70                                    | NWNA_1009            | A625G             | D39Y           | 1726463          | T   | C   |            |            |                | 1                |
| hSNP          | allophycocyanin accessory regulator Hca  | NWNA_1655            | G17A              | R64I           | 1811770          | C   | T   |            |            |                | 1                |
| hSNP          |                                          |                      |                   |                |                  |     |     |            |            |                |                  |
